# Supplementary material for: Trace Element and Sulfur Isotopic Analysis of Pyrite from the Luyuangou Gold Deposit, Xiong’ershan Au-Ag Polymetallic District, Central China: Implications for The Origin and Evolution of Ore-Forming Fluids
Source: MDPI journal article supplement (doi:10.3390/min13030407), 2023-03-15
Supplement: s1 [file s1]

## Supplementary Materials

Table S1. LA-ICP-MS analyses of various pyrite generations from the Luyuangou gold deposit

| No.      | Type  | Ti      | Co      | Ni     | CO/Ni  | Cu     | Zn     | As     | Ag      | Sb    | Au    | Pb       | Bi    |
|----------|-------|---------|---------|--------|--------|--------|--------|--------|---------|-------|-------|----------|-------|
| L30-1-01 | Py1-1 | 21.957  | 43.116  | 13.960 | 3.089  | 2.436  | 1.718  | 0.723  | 0.016   | 2.318 | 0.000 | 54.436   | 0.028 |
| L30-1-02 | Py1-1 | 4.476   | 26.069  | 5.452  | 4.781  | 2.601  | 5.052  | 0.889  | 0.044   | 1.767 | 0.023 | 49.480   | 0.049 |
| L30-1-03 | Py1-1 | 289.911 | 18.427  | 17.478 | 1.054  | 7.973  | 43.110 | 40.478 | 4.728   | 3.915 | 0.057 | 203.581  | 0.012 |
| L30-1-04 | Py1-1 | 43.049  | 20.241  | 30.092 | 0.673  | 31.561 | 79.208 | 34.524 | 9.924   | 8.983 | 0.116 | 507.632  | 0.028 |
| L30-1-05 | Py1-1 | 9.140   | 5.700   | 3.300  | 1.727  | 1.010  | 3.700  | 3.600  | 10.582  | 0.038 | 0.090 | 0.080    | 0.072 |
| L30-1-06 | Py1-1 | 10.378  | 36.004  | 9.072  | 3.968  | 24.827 | 3.510  | 2.068  | 0.710   | 2.543 | 0.000 | 69.938   | 0.017 |
| L30-1-07 | Py1-1 | 77.003  | 8.025   | 11.025 | 0.728  | 2.071  | 2.197  | 1.315  | 0.843   | 0.734 | 0.052 | 24.642   | 0.015 |
| L30-1-08 | Py1-1 | 84.031  | 86.011  | 98.238 | 0.876  | 2.769  | 0.874  | 0.836  | 0.316   | 1.011 | 0.011 | 18.516   | 0.000 |
| L30-2-01 | Py1-1 | 622.397 | 151.604 | 12.110 | 12.519 | 72.336 | 6.634  | 5.089  | 171.892 | 4.857 | 0.290 | 2756.834 | 0.245 |

|          |       |        |        |        |        |         |        |        |         |        |       |          |       |
|----------|-------|--------|--------|--------|--------|---------|--------|--------|---------|--------|-------|----------|-------|
| L30-2-02 | Py1-1 | 3.245  | 46.279 | 17.087 | 2.708  | 3.249   | 1.780  | 1.533  | 1.449   | 2.191  | 0.029 | 81.414   | 0.004 |
| L30-2-03 | Py1-1 | 3.451  | 19.177 | 18.013 | 1.065  | 0.728   | 1.823  | 1.227  | 0.306   | 0.420  | 0.012 | 11.592   | 0.003 |
| L30-1-09 | Py1-2 | 5.666  | 46.544 | 4.254  | 10.942 | 0.584   | 1.186  | 1.456  | 0.016   | 0.495  | 0.000 | 13.130   | 0.007 |
| L30-1-10 | Py1-2 | 20.361 | 12.880 | 15.260 | 0.844  | 176.895 | 74.683 | 42.159 | 25.367  | 2.081  | 0.051 | 59.931   | 0.010 |
| L30-1-11 | Py1-2 | 85.267 | 3.866  | 3.595  | 1.075  | 7.670   | 71.986 | 39.757 | 4.018   | 1.734  | 0.013 | 149.872  | 0.008 |
| L30-1-12 | Py1-2 | 16.112 | 1.499  | 4.226  | 0.355  | 2.232   | 4.094  | 1.915  | 2.521   | 0.149  | 0.057 | 6.851    | 0.000 |
| L30-1-13 | Py1-2 | 4.863  | 4.297  | 3.710  | 1.158  | 4.805   | 1.582  | 29.773 | 0.020   | 0.000  | 0.016 | 0.110    | 0.011 |
| L30-1-14 | Py1-2 | 4.642  | 56.739 | 36.468 | 1.556  | 1.290   | 2.252  | 0.000  | 0.045   | 0.102  | 0.005 | 1.827    | 0.000 |
| L30-1-15 | Py1-2 | 5.392  | 0.876  | 0.677  | 1.293  | 0.385   | 1.739  | 0.484  | 0.340   | 0.124  | 0.022 | 4.700    | 0.003 |
| L30-1-16 | Py1-2 | 77.998 | 80.278 | 27.297 | 2.941  | 2.901   | 2.551  | 1.578  | 0.622   | 1.500  | 0.000 | 42.191   | 0.006 |
| L30-2-04 | Py1-2 | 14.437 | 0.000  | 0.000  | 0.000  | 27.237  | 34.072 | 15.204 | 22.105  | 15.711 | 0.398 | 4453.609 | 2.963 |
| L30-2-05 | Py1-2 | 4.468  | 38.729 | 13.665 | 2.834  | 12.064  | 2.494  | 0.695  | 112.779 | 1.222  | 0.845 | 7207.926 | 0.775 |

|          |       |           |         |        |       |         |        |          |         |         |       |          |       |
|----------|-------|-----------|---------|--------|-------|---------|--------|----------|---------|---------|-------|----------|-------|
| L30-2-06 | Py1-2 | 103.578   | 22.075  | 32.026 | 0.689 | 27.468  | 12.195 | 11.470   | 7.816   | 5.422   | 0.100 | 345.122  | 0.017 |
| L30-2-07 | Py1-2 | 2.629     | 48.610  | 19.434 | 2.501 | 2.871   | 1.704  | 1.788    | 1.373   | 1.466   | 0.051 | 48.168   | 0.002 |
| L30-2-08 | Py1-2 | 4.785     | 17.141  | 11.475 | 1.494 | 3.441   | 2.408  | 9.180    | 3.881   | 0.685   | 0.029 | 27.630   | 0.000 |
| L30-2-09 | Py1-2 | 5.271     | 8.658   | 7.755  | 1.116 | 2.599   | 2.652  | 9.794    | 2.033   | 1.992   | 0.076 | 62.258   | 0.012 |
| L30-2-10 | Py1-2 | 353.222   | 7.804   | 11.509 | 0.678 | 3.669   | 1.005  | 17.914   | 1.692   | 1.176   | 0.067 | 32.377   | 0.020 |
| 850-2-01 | Py2   | 5905.537  | 137.393 | 74.238 | 1.851 | 80.080  | 25.544 | 5928.279 | 107.541 | 85.290  | 2.002 | 733.480  | 0.161 |
| 850-2-02 | Py2   | 60.319    | 63.168  | 50.582 | 1.249 | 81.870  | 11.709 | 8021.926 | 28.369  | 14.659  | 1.993 | 359.576  | 0.015 |
| 850-2-03 | Py2   | 10938.207 | 152.496 | 70.683 | 2.157 | 98.414  | 8.420  | 5291.908 | 102.306 | 124.158 | 1.042 | 776.779  | 0.038 |
| 850-2-04 | Py2   | 179.052   | 79.012  | 51.356 | 1.539 | 62.123  | 5.500  | 4763.258 | 27.655  | 22.879  | 1.868 | 2662.411 | 0.063 |
| 850-2-05 | Py2   | 260.122   | 78.823  | 90.730 | 0.869 | 130.894 | 18.351 | 4696.616 | 17.042  | 20.552  | 1.895 | 656.293  | 0.041 |
| 850-2-06 | Py2   | 198.432   | 175.318 | 222.34 | 0.789 | 143.755 | 40.895 | 3206.214 | 43.093  | 36.608  | 1.855 | 893.703  | 0.060 |
| 820-1-01 | Py2   | 5.398     | 34.364  | 49.129 | 0.699 | 38.111  | 6.976  | 5241.525 | 2.702   | 48.035  | 0.135 | 2181.131 | 0.012 |

|          |     |          |        |         |       |         |           |          |        |         |       |           |       |
|----------|-----|----------|--------|---------|-------|---------|-----------|----------|--------|---------|-------|-----------|-------|
| 820-1-02 | Py2 | 3.466    | 75.266 | 105.105 | 0.716 | 49.112  | 9.010     | 3778.732 | 3.133  | 78.262  | 0.250 | 68.605    | 0.009 |
| 820-1-03 | Py2 | 3.371    | 51.977 | 56.806  | 0.915 | 33.203  | 3381.486  | 5770.019 | 9.623  | 50.470  | 0.605 | 8073.892  | 0.010 |
| 820-1-04 | Py2 | 2.198    | 19.166 | 35.639  | 0.538 | 12.582  | 2.440     | 6909.785 | 1.433  | 67.132  | 0.052 | 98.600    | 0.008 |
| 820-1-05 | Py2 | 8.854    | 69.878 | 90.875  | 0.769 | 54.967  | 60282.629 | 3427.082 | 4.131  | 56.784  | 0.397 | 134.086   | 0.002 |
| 820-1-06 | Py2 | 4.030    | 41.981 | 43.245  | 0.971 | 33.483  | 8.383     | 8476.713 | 8.995  | 119.395 | 0.287 | 6428.146  | 0.017 |
| 820-1-07 | Py2 | 6.220    | 57.027 | 58.472  | 0.975 | 41.479  | 14.204    | 3731.478 | 8.053  | 47.830  | 0.294 | 4302.967  | 0.016 |
| 820-1-08 | Py2 | 7.317    | 42.792 | 37.050  | 1.155 | 41.316  | 3.770     | 6510.101 | 5.649  | 77.929  | 0.219 | 3715.138  | 0.013 |
| 820-1-09 | Py2 | 658.493  | 53.881 | 52.330  | 1.030 | 24.572  | 8.104     | 6621.725 | 6.824  | 86.717  | 0.233 | 2233.195  | 0.002 |
| 820-1-10 | Py2 | 2323.245 | 28.056 | 23.329  | 1.203 | 13.936  | 3.604     | 2966.867 | 4.263  | 38.399  | 0.195 | 1990.185  | 0.005 |
| 820-1-11 | Py2 | 59.531   | 77.303 | 102.265 | 0.756 | 24.337  | 8.078     | 6197.820 | 5.747  | 85.819  | 0.312 | 4162.959  | 0.014 |
| 820-1-12 | Py2 | 2.382    | 28.648 | 34.117  | 0.840 | 17.509  | 4.231     | 7995.637 | 1.183  | 65.930  | 0.206 | 313.825   | 0.022 |
| 820-2-01 | Py2 | 43.490   | 94.724 | 65.201  | 1.453 | 184.777 | 31.464    | 1882.618 | 21.855 | 41.476  | 1.299 | 30087.502 | 0.047 |

|           |     |          |        |        |       |         |          |          |         |         |        |           |       |
|-----------|-----|----------|--------|--------|-------|---------|----------|----------|---------|---------|--------|-----------|-------|
| 820-2-02  | Py2 | 55.644   | 86.361 | 57.712 | 1.496 | 156.929 | 158.195  | 1904.040 | 7.914   | 61.668  | 0.347  | 2457.984  | 0.016 |
| 820-2-03  | Py2 | 135.041  | 6.064  | 9.554  | 0.635 | 13.651  | 13.615   | 72.639   | 0.791   | 4.005   | 0.022  | 147.707   | 0.006 |
| 820-2-04  | Py2 | 4.632    | 57.700 | 32.038 | 1.801 | 159.481 | 34.370   | 4681.711 | 11.275  | 38.613  | 0.625  | 13502.028 | 0.019 |
| 820-4-01  | Py2 | 8.967    | 54.288 | 48.410 | 1.121 | 355.763 | 44.002   | 2110.939 | 12.541  | 208.132 | 0.387  | 423.594   | 0.066 |
| 820-4-02  | Py2 | 3.248    | 40.167 | 59.759 | 0.672 | 214.930 | 50.252   | 4449.564 | 18.865  | 196.378 | 1.508  | 136.420   | 0.034 |
| 820-4-03  | Py2 | 17.282   | 25.491 | 57.955 | 0.440 | 961.954 | 430.637  | 6097.655 | 97.748  | 624.007 | 2.215  | 19035.658 | 0.214 |
| 820-4-04  | Py2 | 3379.914 | 44.395 | 64.986 | 0.683 | 127.790 | 92.902   | 4645.046 | 33.476  | 267.035 | 12.522 | 1064.501  | 0.017 |
| 820-4-05  | Py2 | 737.109  | 20.167 | 38.426 | 0.525 | 558.872 | 25.322   | 4299.768 | 59.866  | 360.716 | 12.095 | 295.850   | 0.000 |
| 820-4-06  | Py2 | 591.477  | 66.749 | 79.027 | 0.845 | 194.459 | 13.367   | 2991.103 | 60.601  | 195.102 | 10.308 | 560.014   | 0.020 |
| 820-4-07  | Py2 | 2122.13  | 55.786 | 75.129 | 0.743 | 109.456 | 16.311   | 4912.537 | 44.863  | 215.150 | 6.518  | 4423.070  | 0.053 |
| 820-13-01 | Py2 | 204.361  | 56.726 | 142.10 | 0.399 | 89.276  | 1659.867 | 6451.508 | 623.286 | 125.527 | 11.244 | 280.806   | 0.000 |
| 820-13-02 | Py2 | 439.696  | 59.827 | 49.179 | 1.217 | 82.596  | 83.314   | 6295.457 | 71.088  | 98.194  | 4.817  | 12646.905 | 0.327 |

|           |     |          |        |         |       |          |          |           |          |          |        |            |       |
|-----------|-----|----------|--------|---------|-------|----------|----------|-----------|----------|----------|--------|------------|-------|
| 820-13-03 | Py2 | 143.120  | 83.883 | 130.285 | 0.644 | 148.507  | 1175.219 | 10135.863 | 38.722   | 155.221  | 8.612  | 455.104    | 0.023 |
| 820-13-04 | Py2 | 9.697    | 68.355 | 294.411 | 0.232 | 113.034  | 36.538   | 9924.637  | 1161.607 | 150.868  | 17.024 | 707.919    | 0.022 |
| 820-13-05 | Py2 | 4.689    | 53.957 | 249.245 | 0.216 | 187.591  | 233.190  | 9502.092  | 1009.620 | 203.734  | 21.410 | 758.432    | 0.045 |
| 820-13-06 | Py2 | 44.737   | 58.894 | 212.443 | 0.277 | 125.410  | 408.333  | 9891.104  | 386.126  | 91.111   | 4.501  | 4361.294   | 0.103 |
| 820-13-07 | Py2 | 2178.968 | 11.486 | 21.569  | 0.533 | 24.911   | 9.529    | 6518.012  | 8.750    | 80.450   | 3.989  | 74.186     | 0.008 |
| 820-13-08 | Py2 | 1619.965 | 56.365 | 110.549 | 0.510 | 67.962   | 97.391   | 11611.537 | 28.132   | 131.142  | 2.995  | 345.058    | 0.022 |
| 820-13-09 | Py2 | 1685.375 | 35.021 | 138.175 | 0.253 | 70.971   | 11.284   | 9076.212  | 41.960   | 171.876  | 3.861  | 684.518    | 0.031 |
| 820-8-01  | Py3 | 2.838    | 10.136 | 5.500   | 1.843 | 1024.131 | 140.186  | 4436.026  | 105.420  | 1480.013 | 6.803  | 4736.698   | 0.018 |
| 820-8-02  | Py3 | 3.165    | 5.119  | 2.996   | 1.709 | 241.947  | 43.602   | 6096.066  | 32.760   | 874.727  | 17.565 | 1783.509   | 0.006 |
| 820-8-03  | Py3 | 3.810    | 7.456  | 3.595   | 2.074 | 118.408  | 30.899   | 12261.422 | 26.632   | 1216.272 | 2.008  | 2684.400   | 0.020 |
| 820-8-04  | Py3 | 4.796    | 8.090  | 8.551   | 0.946 | 69.370   | 18.891   | 15917.496 | 25.997   | 422.863  | 75.937 | 3526.251   | 0.007 |
| 820-8-05  | Py3 | 99.757   | 54.995 | 16.725  | 3.288 | 8548.844 | 36.977   | 4740.764  | 134.548  | 305.886  | 1.420  | 146751.631 | 0.154 |

|          |     |         |        |        |       |          |            |           |         |          |       |           |       |
|----------|-----|---------|--------|--------|-------|----------|------------|-----------|---------|----------|-------|-----------|-------|
| 820-8-06 | Py3 | 6.144   | 17.424 | 10.327 | 1.687 | 119.249  | 404.903    | 15255.124 | 47.777  | 1216.842 | 0.900 | 7415.808  | 0.059 |
| 820-8-07 | Py3 | 5.225   | 12.563 | 3.403  | 3.692 | 229.661  | 48.747     | 13468.760 | 43.877  | 1024.565 | 3.707 | 31109.991 | 0.046 |
| 820-8-08 | Py3 | 2.807   | 4.201  | 1.230  | 3.414 | 25.898   | 15.114     | 16706.804 | 13.164  | 813.567  | 2.170 | 50404.724 | 0.070 |
| 820-8-09 | Py3 | 2.497   | 0.265  | 0.167  | 1.582 | 8.588    | 257.505    | 12731.665 | 2.770   | 397.591  | 0.471 | 536.332   | 0.002 |
| 820-8-10 | Py3 | 13.579  | 20.174 | 6.793  | 2.970 | 473.530  | 40688.877  | 4094.400  | 229.410 | 631.119  | 3.527 | 3072.955  | 0.050 |
| 820-9-01 | Py3 | 6.434   | 24.640 | 3.062  | 8.047 | 40.789   | 84556.798  | 9887.563  | 50.514  | 20.734   | 2.715 | 1630.088  | 0.080 |
| 820-9-02 | Py3 | 4.419   | 0.000  | 0.000  | 0.000 | 15.745   | 0.000      | 15187.626 | 0.213   | 41.172   | 1.096 | 42.767    | 0.000 |
| 820-9-03 | Py3 | 3.704   | 11.673 | 4.127  | 2.828 | 344.650  | 3465.104   | 10250.782 | 151.202 | 478.717  | 4.984 | 2865.826  | 0.000 |
| 820-9-04 | Py3 | 230.907 | 28.539 | 17.882 | 1.596 | 185.302  | 7239.622   | 4761.371  | 138.947 | 284.606  | 3.001 | 2137.164  | 0.007 |
| 820-9-05 | Py3 | 2.716   | 1.540  | 2.791  | 0.552 | 139.649  | 28.893     | 15721.405 | 17.609  | 713.921  | 1.528 | 1589.283  | 0.004 |
| 820-9-06 | Py3 | 4.816   | 1.688  | 1.108  | 1.524 | 77.961   | 146.547    | 15589.224 | 11.115  | 109.074  | 0.260 | 322.124   | 0.004 |
| 820-9-07 | Py3 | 2.288   | 13.360 | 2.682  | 4.982 | 2338.980 | 109036.359 | 14782.898 | 250.582 | 2033.289 | 0.633 | 789.522   | 0.004 |

|           |     |         |         |        |        |         |          |           |         |          |       |            |       |
|-----------|-----|---------|---------|--------|--------|---------|----------|-----------|---------|----------|-------|------------|-------|
| 820-9-08  | Py3 | 4.939   | 1.462   | 0.854  | 1.711  | 25.816  | 37.412   | 6317.830  | 7.942   | 19.082   | 7.811 | 99.538     | 0.008 |
| 820-9-09  | Py3 | 2.653   | 42.372  | 18.585 | 2.280  | 499.706 | 19.157   | 6704.885  | 347.560 | 837.645  | 3.961 | 14886.902  | 0.047 |
| 820-9-10  | Py3 | 2.477   | 3.909   | 1.861  | 2.100  | 26.020  | 6.822    | 10776.450 | 36.938  | 45.152   | 0.529 | 686.714    | 0.009 |
| 820-9-11  | Py3 | 3.608   | 14.417  | 6.723  | 2.144  | 160.574 | 1220.409 | 11416.602 | 98.907  | 156.818  | 0.711 | 15460.160  | 0.015 |
| 820-9-12  | Py3 | 4.902   | 26.474  | 10.922 | 2.424  | 199.423 | 48.543   | 10295.094 | 145.544 | 978.829  | 3.771 | 159346.173 | 0.183 |
| 820-8-13  | Py3 | 1.882   | 34.084  | 12.938 | 2.634  | 238.813 | 36.852   | 9390.229  | 190.011 | 324.938  | 2.438 | 135102.691 | 0.114 |
| 820-8-14  | Py3 | 3.275   | 6.458   | 1.975  | 3.270  | 192.020 | 120.720  | 3464.836  | 83.723  | 1046.482 | 0.685 | 2934.074   | 0.005 |
| 1110-6-01 | Py4 | 106.100 | 79.613  | 15.888 | 5.011  | 34.885  | 67.674   | 33.273    | 23.324  | 3.285    | 0.109 | 156.111    | 0.027 |
| 1110-6-02 | Py4 | 4.787   | 4.643   | 92.017 | 0.050  | 4.728   | 5.785    | 11.072    | 7.083   | 0.354    | 0.125 | 10.401     | 0.010 |
| 1110-6-03 | Py4 | 254.722 | 256.089 | 23.745 | 10.785 | 41.936  | 38.720   | 34.916    | 80.362  | 4.188    | 0.407 | 174.816    | 0.067 |
| 1110-6-04 | Py4 | 626.524 | 112.052 | 15.015 | 7.463  | 33.896  | 38.056   | 51.949    | 38.707  | 2.886    | 0.250 | 708.597    | 0.338 |
| 1110-6-05 | Py4 | 2565.77 | 56.943  | 8.302  | 6.859  | 35.021  | 77.102   | 13.178    | 17.467  | 3.280    | 0.063 | 368.661    | 0.061 |



|           |     |         |         |        |        |        |         |         |        |       |       |         |       |
|-----------|-----|---------|---------|--------|--------|--------|---------|---------|--------|-------|-------|---------|-------|
| 1110-6-06 | Py4 | 144.836 | 147.497 | 12.249 | 12.042 | 43.994 | 57.902  | 19.134  | 13.904 | 3.858 | 0.077 | 213.201 | 0.044 |
| 1110-6-07 | Py4 | 4.492   | 7.561   | 2.231  | 3.389  | 0.521  | 4.060   | 7.782   | 0.048  | 0.046 | 0.005 | 0.179   | 0.030 |
| 1110-6-08 | Py4 | 3.389   | 76.043  | 5.389  | 14.110 | 0.774  | 3.319   | 118.591 | 0.000  | 0.000 | 0.011 | 0.119   | 0.098 |
| 1110-6-09 | Py4 | 4.435   | 103.553 | 20.442 | 5.066  | 0.072  | 5.241   | 6.763   | 0.191  | 0.000 | 0.020 | 0.316   | 0.014 |
| 1110-6-10 | Py4 | 3.679   | 157.323 | 5.394  | 29.164 | 1.491  | 3.307   | 149.147 | 2.679  | 0.270 | 0.037 | 2.610   | 0.009 |
| 1110-6-11 | Py4 | 207.918 | 63.700  | 14.965 | 4.257  | 35.647 | 75.691  | 24.922  | 21.097 | 5.003 | 0.294 | 491.586 | 0.050 |
| 1110-6-12 | Py4 | 715.887 | 95.735  | 11.665 | 8.207  | 40.896 | 54.776  | 15.329  | 15.017 | 4.098 | 0.084 | 234.446 | 0.066 |
| 1110-7-01 | Py4 | 123.995 | 208.249 | 17.208 | 12.102 | 43.414 | 42.538  | 23.056  | 18.629 | 3.907 | 0.082 | 168.762 | 0.057 |
| 1110-7-02 | Py4 | 4.726   | 29.008  | 4.417  | 6.567  | 0.110  | 1.920   | 1.795   | 0.149  | 0.000 | 0.000 | 0.000   | 0.003 |
| 1110-7-03 | Py4 | 6.977   | 69.332  | 30.070 | 2.306  | 10.156 | 181.714 | 5.281   | 4.744  | 1.384 | 0.028 | 182.339 | 0.022 |
| 1110-7-04 | Py4 | 11.958  | 94.409  | 41.377 | 2.282  | 9.381  | 102.923 | 11.749  | 5.655  | 1.486 | 0.049 | 273.281 | 0.044 |
| 1110-7-05 | Py4 | 4.417   | 33.475  | 35.609 | 0.940  | 9.558  | 18.617  | 12.494  | 6.579  | 2.286 | 0.015 | 194.423 | 0.044 |

|           |     |       |        |        |       |        |        |        |        |       |       |         |       |
|-----------|-----|-------|--------|--------|-------|--------|--------|--------|--------|-------|-------|---------|-------|
| 1110-7-06 | Py4 | 3.318 | 13.107 | 37.142 | 0.353 | 0.419  | 8.923  | 11.129 | 0.084  | 0.000 | 0.010 | 6.062   | 0.007 |
| 1110-7-07 | Py4 | 2.399 | 6.109  | 34.972 | 0.175 | 0.316  | 2.332  | 75.246 | 0.417  | 0.000 | 0.014 | 0.361   | 0.001 |
| 1110-7-08 | Py4 | 5.395 | 4.735  | 9.377  | 0.505 | 1.061  | 1.664  | 25.182 | 1.108  | 0.341 | 0.000 | 5.723   | 0.000 |
| 1110-7-09 | Py4 | 5.845 | 40.331 | 31.707 | 1.272 | 11.706 | 27.063 | 4.693  | 37.147 | 0.635 | 0.073 | 159.896 | 0.020 |

---

\*0 = below detection limit.

Table S2. Composition of sulfur isotopes (‰) of various pyrite generations in the  
Luyuangou gold deposit

| No. | Type  | $^{34}\text{S}/^{32}\text{S}$ | Error    | $^{33}\text{S}/^{32}\text{S}$ | Error    | $^{32}\text{S}(\text{V})$ | $\delta^{34}\text{S}$ | SD       |
|-----|-------|-------------------------------|----------|-------------------------------|----------|---------------------------|-----------------------|----------|
| 01  | Py1-1 | 0.046837                      | 3.87E-06 | 0.008169                      | 1.19E-06 | 18.2                      | 0.559895              | 0.826264 |
| 02  | Py1-1 | 0.046889                      | 6.8E-06  | 0.008168                      | 2.3E-06  | 14.9                      | 1.652456              | 1.450249 |
| 03  | Py1-1 | 0.04694                       | 3.67E-06 | 0.008161                      | 1.19E-06 | 17.6                      | 1.008662              | 0.781852 |
| 04  | Py1-1 | 0.046938                      | 4.46E-06 | 0.00816                       | 1.29E-06 | 18.5                      | 0.977341              | 0.950182 |
| 05  | Py1-1 | 0.047096                      | 4.58E-06 | 0.008168                      | 1.11E-06 | 18.6                      | 1.030176              | 0.972479 |
| 06  | Py1-2 | 0.046899                      | 3.6E-06  | 0.008171                      | 1.13E-06 | 18.8                      | 1.878054              | 0.767606 |
| 07  | Py1-2 | 0.046882                      | 3.24E-06 | 0.008176                      | 1.21E-06 | 18.1                      | 1.510096              | 0.691099 |
| 08  | Py1-2 | 0.046877                      | 4.04E-06 | 0.008151                      | 1.1E-06  | 17.9                      | -0.31978              | 0.861821 |
| 09  | Py1-2 | 0.047033                      | 3.95E-06 | 0.008166                      | 1.27E-06 | 18.8                      | -0.30896              | 0.839835 |
| 10  | Py1-2 | 0.047272                      | 6.81E-06 | 0.008176                      | 1.32E-06 | 18.9                      | 0.483016              | 1.44059  |
| 11  | Py1-2 | 0.047287                      | 4.63E-06 | 0.008178                      | 1.31E-06 | 18.7                      | 0.795754              | 0.979126 |
| 12  | Py2   | 0.046705                      | 9.71E-06 | 0.008116                      | 1.62E-06 | 19                        | -11.5196              | 1.079021 |
| 13  | Py2   | 0.047213                      | 8.1E-06  | 0.008154                      | 1.87E-06 | 17.9                      | -8.16208              | 1.715612 |
| 14  | Py2   | 0.047078                      | 0.000003 | 0.008142                      | 3.03E-06 | 18.9                      | -11.0079              | 0.637242 |
| 15  | Py2   | 0.047121                      | 1.13E-06 | 0.008142                      | 1.58E-06 | 19.5                      | -10.0947              | 0.239806 |
| 16  | Py2   | 0.047132                      | 1.35E-06 | 0.008158                      | 2.2E-06  | 18.5                      | -11.1014              | 0.286427 |
| 17  | Py2   | 0.047083                      | 9.62E-06 | 0.008146                      | 1.46E-06 | 18.5                      | -12.1317              | 1.043186 |
| 18  | Py2   | 0.047371                      | 1.11E-06 | 0.008172                      | 1.56E-06 | 19.3                      | -6.09581              | 0.234319 |

|    |     |          |          |          |          |      |          |          |
|----|-----|----------|----------|----------|----------|------|----------|----------|
| 19 | Py2 | 0.047326 | 6.66E-06 | 0.008171 | 1.87E-06 | 18.3 | -7.03869 | 1.407252 |
| 20 | Py2 | 0.047048 | 7.23E-06 | 0.008139 | 1.53E-06 | 18.8 | -13.0193 | 1.536719 |
| 21 | Py2 | 0.047054 | 5.82E-06 | 0.008139 | 1.34E-06 | 19.3 | -12.9057 | 1.236884 |
| 22 | Py2 | 0.046996 | 5.97E-06 | 0.008136 | 1.16E-06 | 19.4 | -14.1253 | 1.270334 |
| 23 | Py2 | 0.047049 | 1.34E-06 | 0.008136 | 1.73E-06 | 18.8 | -15.4004 | 0.284808 |
| 24 | Py2 | 0.047099 | 5.75E-06 | 0.008143 | 1.9E-06  | 17.7 | -14.3642 | 1.220838 |
| 25 | Py2 | 0.047192 | 6.97E-06 | 0.008156 | 1.42E-06 | 17.2 | -12.4168 | 1.476947 |
| 26 | Py3 | 0.046926 | 4.19E-06 | 0.00813  | 0.000001 | 18.9 | -19.4921 | 0.892893 |
| 27 | Py3 | 0.047078 | 4.81E-06 | 0.00815  | 1.16E-06 | 18.7 | -16.3223 | 1.02171  |
| 28 | Py3 | 0.047145 | 5.07E-06 | 0.008148 | 1.2E-06  | 19.7 | -14.9199 | 1.075403 |
| 29 | Py3 | 0.046953 | 4.77E-06 | 0.00814  | 1.38E-06 | 18.6 | -18.9322 | 1.015911 |
| 30 | Py3 | 0.04715  | 7.2E-06  | 0.008158 | 1.41E-06 | 20.6 | -14.9156 | 1.52704  |
| 31 | Py3 | 0.047086 | 5.65E-06 | 0.008151 | 1.52E-06 | 19.2 | -16.2574 | 1.199938 |
| 32 | Py3 | 0.046963 | 4.44E-06 | 0.00814  | 1.1E-06  | 18.6 | -18.8273 | 0.945432 |
| 33 | Py3 | 0.047271 | 4.2E-06  | 0.008176 | 1.3E-06  | 19.8 | -12.3885 | 0.888492 |
| 34 | Py3 | 0.047153 | 5.21E-06 | 0.008144 | 1.72E-06 | 18.6 | -14.862  | 1.104923 |
| 35 | Py4 | 0.048186 | 5.21E-06 | 0.008245 | 1.6E-06  | 17.9 | 3.170546 | 1.081234 |
| 36 | Py4 | 0.048159 | 6.58E-06 | 0.00824  | 2.21E-06 | 13.6 | 2.615598 | 1.366307 |
| 37 | Py4 | 0.048187 | 5.05E-06 | 0.008251 | 2.72E-06 | 10.4 | 3.198834 | 1.047999 |
| 38 | Py4 | 0.04816  | 7.19E-06 | 0.008241 | 1.78E-06 | 17.3 | 2.64139  | 1.492932 |
| 39 | Py4 | 0.048086 | 4.62E-06 | 0.008234 | 1.31E-06 | 17.9 | 1.088033 | 0.960787 |

|    |     |          |          |          |          |      |          |          |
|----|-----|----------|----------|----------|----------|------|----------|----------|
| 40 | Py4 | 0.048205 | 6.17E-06 | 0.008244 | 1.43E-06 | 17.2 | 3.35586  | 1.279947 |
| 41 | Py4 | 0.048209 | 4.87E-06 | 0.008251 | 2.25E-06 | 10.9 | 3.43114  | 1.01019  |
| 42 | Py4 | 0.048195 | 5.37E-06 | 0.008236 | 2.12E-06 | 12.3 | 3.136196 | 1.114234 |

---
